# Supplementary material for: Origin of an Alternative Genetic Code in the Extremely Small and GC–Rich Genome of a Bacterial Symbiont
Source: PubMed Central journal article supplement (PMC2704378; doi:10.1371/journal.pgen.1000565), 2009-07-17

# Figure S1

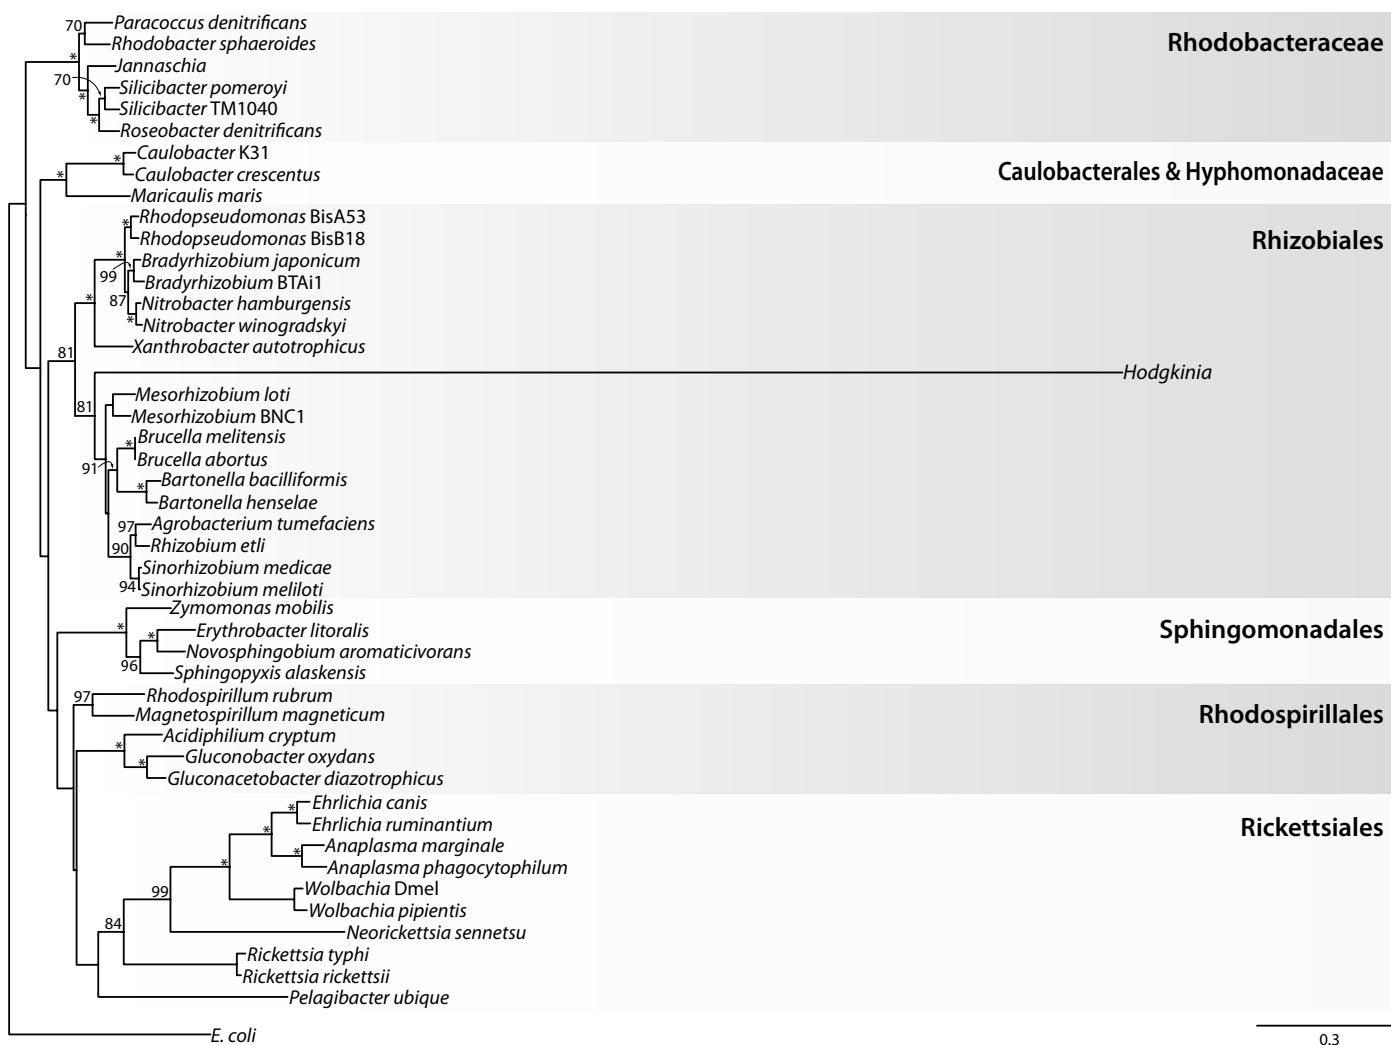

Supplement: pgen.1000565.s001.pdf [file pgen.1000565.s001.pdf]
