# Supplementary material for: Origin of an Alternative Genetic Code in the Extremely Small and GC–Rich Genome of a Bacterial Symbiont
Source: PubMed Central journal article supplement (PMC2704378; doi:10.1371/journal.pgen.1000565), 2009-07-17
Supplement: pgen.1000565.s003.pdf [file pgen.1000565.s003.pdf]

# Table S2

| <b>4 box codon</b> | <b>G</b> | <b>C</b> | <b>A</b> | <b>T</b> | <b>Codon total</b> |
|--------------------|----------|----------|----------|----------|--------------------|
| Ala (GCN)          | 2511     | 1391     | 652      | 2034     | 6588               |
| Gly (GGN)          | 614      | 1888     | 254      | 481      | 3237               |
| Leu (CTN)          | 1755     | 453      | 849      | 911      | 3968               |
| Pro (CCN)          | 449      | 375      | 326      | 346      | 1496               |
| Arg (CGN)          | 323      | 1364     | 324      | 282      | 2293               |
| Ser (TCN)          | 777      | 226      | 352      | 316      | 1671               |
| Thr (ACN)          | 816      | 373      | 343      | 309      | 1841               |
| Val (GTN)          | 2064     | 574      | 522      | 1280     | 4440               |
| Total              | 9309     | 6644     | 3622     | 5959     | 25534              |
| Percentage         | 36.5     | 26.0     | 14.2     | 23.3     |                    |
